# Supplementary material for: Precipitation in the mountains of Central Asia: isotopic composition and source regions
Source: Copernicus journal article supplement (doi:10.5194/egusphere-2023-2030), 2023-10-19
Supplement: Supplementary file 1 [file egusphere-2023-2030-supplement.pdf]

## **Precipitation in the mountains of Central Asia: isotopic composition and source regions**

Saidaliyeva Z.<sup>1</sup>, Shahgedanova M.<sup>1</sup>, Yapiyev V.<sup>1,2</sup>, Wade A.J.<sup>1</sup>, Akbarov F.<sup>3</sup>, Esenaman uulu M.<sup>4</sup>, Kalashnikova O.<sup>4</sup>, Kapitsa V.<sup>5</sup>, Kasatkin N.<sup>5</sup>, Rakhimov I.<sup>6</sup>, Satylkanov R.<sup>7</sup>, Sayakbaev D.<sup>7</sup>, Semakova E.<sup>8</sup>, Severskiy I.<sup>5</sup>, Petrov M.<sup>3</sup>, Umirzakov G.<sup>9</sup>, and Usubaliyev R.<sup>4</sup>

<sup>1</sup>Department of Geography and Environmental Science, University of Reading, Reading, RG66AB, UK;

<sup>2</sup>School of Mining and Geosciences, Nazarbayev University, Astana, 010000, Kazakhstan

<sup>3</sup>Institute of Geology and Geophysics, Tashkent, 100164, Uzbekistan;

<sup>4</sup>Central-Asian Institute for Applied Geosciences, Bishkek, 720027, Kyrgyzstan;

<sup>5</sup>Central Asian Regional Glaciological Centre Under the Auspices of UNESCO, Almaty, 050010, Kazakhstan;

<sup>6</sup>Institute of Water Problems, Hydropower and Environment, Dushanbe, 734025, Tajikistan;

<sup>7</sup>Tien-Shan High Mountain Scientific Centre, Bishkek, 720033, Kyrgyzstan;

<sup>8</sup>Ulugh Beg Astronomical Institute of the Uzbekistan Academy of Science Tashkent, 100052, Uzbekistan;

<sup>9</sup>National University of Uzbekistan, Tashkent, 100174, Uzbekistan;

*Correspondence to:* Zarina Saidaliyeva (z.saidaliyeva@pgr.reading.ac.uk)

**The file content:**

Table S1: Descriptive statistics of stable isotope ratios and D-excess. N is number of samples; SD is standard deviation.

Table S2: Stepwise regression equations for the meteorological seasons linking  $\delta^{18}\text{O}$ ,  $\delta\text{D}$ , and D-excess with latitude, longitude, and elevation.

Table S3: Mean isotopic ratios for the warm (May-October) and cold (November-April) periods for all samples;  $\delta_w$  – warm period (May-October);  $\delta_c$  – cold period (November-April).

Table S4: Correlation between  $\delta^{18}\text{O}$  and  $\delta\text{D}$  and air temperature for each sampling site. Coefficients of determination are statistically significant at 95% confidence level at all sites except Tashkent.

Table S5: Summary of the OLSR calculations. SE is standard error.

Table S6: The values of slopes, intercepts, and standard deviations from different regression methods applied to the monthly-averaged and event-based data sets. Results of t-test comparing each regression method and OLSR are shown. N is a number of samples.

Table S7: The values of slopes and intercepts and standard errors for different regressions methods applied to event-based samples for each catchment. All metrics are as in Table S6.

Table S8: The values of slopes and intercepts and standard errors for different regressions methods applied to the event-based precipitation in different seasons. All metrics are as in Table S6.

Table S9: The values of slopes, intercepts and standard errors for different regressions methods applied each type of precipitation. All metrics are as in Table S6.

Figure S1: The difference between the data from the Waterisotopes Database and data obtained in this study for (a)  $\delta^{18}\text{O}$ ; (b)  $\delta\text{D}$ .

Figure S2: Values of  $\delta^{18}\text{O}$  for each original cluster for each site and season: (a) UA; (b) CKS; (c) AA; (d) CHK.

Figure S3: Values of D-excess for each original cluster for each site and season: (a) UA; (b) CKS; (c) AA; (d) CHK.

Table S1: Descriptive statistics of stable isotope ratios and D-excess. N is number of samples; SD is standard deviation.

| Catchment          | Ulken Almaty             |        |      |        |       | Chon Kyzyl Suu |        |      |        |       | Ala Archa |       |      |        |       | Chirchik |        |      |        |       |     |
|--------------------|--------------------------|--------|------|--------|-------|----------------|--------|------|--------|-------|-----------|-------|------|--------|-------|----------|--------|------|--------|-------|-----|
|                    | Temporal Resolution/Type | N      | Mean | SD     | Min   | Max            | N      | Mean | SD     | Min   | Max       | N     | Mean | SD     | Min   | Max      | N      | Mean | SD     | Min   | Max |
| <b>Oxygen, ‰</b>   |                          |        |      |        |       |                |        |      |        |       |           |       |      |        |       |          |        |      |        |       |     |
| January            | 8                        | -22.5  | 5.9  | -33.6  | -12.1 | 7              | -11.7  | 4.6  | -17.3  | -4.9  | 7         | -13.1 | 5.4  | -20.2  | -5.8  | 24       | -16.4  | 6.6  | -32.4  | -5.5  |     |
| February           | 21                       | -15.7  | 6.7  | -25.5  | -3.3  | 9              | -16.4  | 6.6  | -23.8  | -1.7  | 16        | -12.6 | 4.8  | -22.1  | -6.6  | 53       | -10.1  | 5.1  | -23.8  | -0.1  |     |
| March              | 25                       | -12.7  | 4.2  | -20.7  | -7.2  | 9              | -11.1  | 1.7  | -13.8  | -8.8  | 16        | -11.0 | 5.2  | -21.5  | -1.7  | 44       | -7.2   | 4.6  | -16.0  | 3.8   |     |
| April              | 20                       | -13.8  | 5.4  | -24.6  | -4.2  | 18             | -12.0  | 5.1  | -20.4  | -3.4  | 9         | -9.5  | 5.7  | -14.9  | 1.9   | 35       | -7.4   | 5.5  | -17.8  | 3.3   |     |
| May                | 37                       | -9.0   | 3.4  | -13.2  | -0.1  | 33             | -9.5   | 3.5  | -15.8  | -2.5  | 12        | -5.2  | 2.0  | -9.4   | -2.1  | 33       | -2.7   | 3.6  | -9.0   | 4.3   |     |
| June               | 47                       | -5.0   | 3.6  | -11.0  | 1.4   | 30             | -5.4   | 4.1  | -12.8  | 6.0   | 5         | -5.0  | 2.3  | -8.0   | -2.4  | 17       | 0.2    | 4.2  | -13.0  | 4.3   |     |
| July               | 45                       | -4.1   | 4.0  | -12.3  | 6.1   | 31             | -3.1   | 2.7  | -7.7   | 5.5   | 8         | -2.0  | 3.1  | -7.2   | 2.4   | 15       | -1.6   | 2.9  | -5.9   | 2.8   |     |
| August             | 49                       | -5.6   | 4.4  | -16.4  | 1.1   | 24             | -5.3   | 3.1  | -11.6  | 0.7   | 15        | -0.4  | 5.2  | -10.6  | 8.6   | 11       | -4.0   | 4.2  | -12.9  | -0.2  |     |
| September          | 34                       | -8.0   | 5.1  | -23.6  | 3.8   | 14             | -6.3   | 3.9  | -12.1  | 2.8   | 6         | -3.4  | 5.3  | -8.8   | 3.2   | 4        | -4.9   | 3.6  | -10.0  | -1.8  |     |
| October            | 30                       | -12.7  | 4.1  | -19.7  | -6.5  | 5              | -8.4   | 4.9  | -13.8  | -2.3  | 7         | -12.1 | 4.3  | -19.7  | -7.6  | 4        | -5.5   | 3.5  | -10.5  | -2.9  |     |
| November           | 14                       | -16.4  | 6.0  | -27.4  | -5.8  | 2              | -19.2  | 1.6  | -20.4  | -18.1 | 7         | -12.6 | 4.8  | -21.1  | -6.1  | 14       | -18.8  | 6.6  | -30.8  | -11.7 |     |
| December           | 8                        | -19.3  | 6.3  | -28.5  | -12.5 | 1              | -15.4  | -    | -15.4  | -15.4 | 7         | -15.0 | 4.9  | -21.7  | -9.3  | 18       | -14.1  | 5.0  | -20.9  | -6.0  |     |
| DJF                | 37                       | -17.9  | 6.9  | -33.6  | -3.3  | 17             | -14.4  | 5.9  | -23.8  | -1.7  | 30        | -13.3 | 4.9  | -22.1  | -5.8  | 95       | -12.5  | 6.1  | -32.4  | -0.1  |     |
| MAM                | 82                       | -11.3  | 4.7  | -24.6  | -0.1  | 60             | -10.5  | 4.0  | -20.4  | -2.5  | 37        | -8.7  | 5.1  | -21.5  | 1.9   | 112      | -6.0   | 5.0  | -17.8  | 4.3   |     |
| JJA                | 141                      | -4.9   | 4.1  | -16.4  | 6.1   | 85             | -4.6   | 3.5  | -12.8  | 6.0   | 28        | -1.7  | 4.5  | -10.6  | 8.6   | 43       | -1.5   | 4.0  | -13.0  | 4.3   |     |
| SON                | 78                       | -11.3  | 5.8  | -27.4  | 3.8   | 21             | -8.0   | 5.4  | -20.4  | 2.8   | 20        | -9.7  | 6.2  | -21.1  | 3.2   | 22       | -13.8  | 8.7  | -30.8  | -1.8  |     |
| Annual             | 338                      | -9.4   | 6.6  | -33.6  | 6.1   | 183            | -7.8   | 5.3  | -23.8  | 6.0   | 115       | -8.4  | 6.6  | -22.1  | 8.6   | 272      | -8.2   | 7.1  | -32.4  | 4.3   |     |
| Mixed              | 45                       | -8.5   | 3.6  | -16.4  | -0.1  | 14             | -11.5  | 3.3  | -15.5  | -1.7  | 17        | -10.5 | 1.6  | -13.8  | -8.0  | 44       | -10.1  | 3.9  | -20.0  | -2.8  |     |
| Rain               | 173                      | -5.4   | 4.1  | -14.8  | 6.1   | 137            | -5.7   | 3.8  | -15.8  | 6.0   | 66        | -4.2  | 4.6  | -12.9  | 8.6   | 152      | -4.0   | 4.7  | -16.5  | 4.3   |     |
| Snow               | 120                      | -15.4  | 5.7  | -33.6  | -3.3  | 32             | -15.0  | 4.4  | -23.8  | -4.9  | 32        | -15.7 | 4.2  | -22.1  | -5.8  | 76       | -15.4  | 6.0  | -32.4  | -4.7  |     |
| <b>Hydrogen, ‰</b> |                          |        |      |        |       |                |        |      |        |       |           |       |      |        |       |          |        |      |        |       |     |
| January            | 8                        | -168.9 | 49.7 | -258.8 | -78.8 | 7              | -87.3  | 29.5 | -138.6 | -58.2 | 7         | -86.5 | 46.9 | -140.9 | -30.8 | 24       | -123.2 | 55.5 | -247.9 | -43.5 |     |
| February           | 21                       | -119.1 | 51.1 | -203.7 | -47.0 | 9              | -125.3 | 45.4 | -186.5 | -39.8 | 16        | -82.9 | 40.5 | -166.4 | -32.8 | 53       | -68.5  | 44.7 | -188.0 | 11.8  |     |
| March              | 25                       | -87.3  | 32.7 | -148.5 | -48.9 | 9              | -83.0  | 15.1 | -101.3 | -57.8 | 16        | -72.0 | 40.5 | -159.9 | -13.1 | 44       | -42.8  | 35.2 | -117.9 | 24.1  |     |
| April              | 20                       | -97.6  | 45.7 | -187.6 | -10.0 | 18             | -87.9  | 40.8 | -156.9 | -3.9  | 9         | -61.1 | 43.8 | -103.8 | 27.3  | 35       | -47.4  | 44.3 | -128.6 | 29.7  |     |
| May                | 37                       | -56.3  | 26.5 | -92.7  | 3.4   | 33             | -61.1  | 30.8 | -115.1 | 6.8   | 12        | -28.3 | 17.7 | -57.0  | -1.8  | 33       | -15.5  | 27.5 | -63.5  | 29.4  |     |
| June               | 47                       | -29.6  | 22.8 | -70.9  | 9.4   | 30             | -32.5  | 26.3 | -85.3  | 17.1  | 5         | -34.7 | 14.5 | -48.0  | -14.0 | 17       | -0.1   | 28.1 | -89.2  | 36.5  |     |
| July               | 45                       | -23.9  | 24.6 | -76.3  | 38.2  | 31             | -10.2  | 17.6 | -45.8  | 19.6  | 8         | -16.4 | 27.7 | -62.8  | 25.8  | 15       | -16.6  | 20.5 | -50.9  | 21.3  |     |
| August             | 49                       | -31.8  | 30.6 | -112.3 | 6.9   | 24             | -22.8  | 23.2 | -71.3  | 18.9  | 15        | 2.7   | 28.9 | -63.2  | 45.2  | 11       | -18.3  | 29.3 | -82.0  | 10.2  |     |

|           |     |        |      |        |       |     |        |      |        |        |     |        |      |        |       |     |        |      |        |       |
|-----------|-----|--------|------|--------|-------|-----|--------|------|--------|--------|-----|--------|------|--------|-------|-----|--------|------|--------|-------|
| September | 34  | -48.1  | 37.9 | -176.8 | 26.6  | 14  | -27.9  | 26.5 | -68.7  | 30.0   | 6   | -12.6  | 32.7 | -53.2  | 24.9  | 4   | -32.0  | 29.8 | -68.6  | -4.4  |
| October   | 30  | -87.3  | 30.6 | -142.3 | -47.9 | 5   | -55.2  | 29.6 | -93.3  | -24.5  | 7   | -73.4  | 42.0 | -141.8 | -25.4 | 4   | -23.3  | 28.5 | -64.0  | -0.5  |
| November  | 14  | -114.9 | 44.9 | -187.8 | -43.4 | 2   | -140.0 | 6.5  | -144.7 | -135.4 | 7   | -76.0  | 40.1 | -151.9 | -42.3 | 14  | -134.9 | 55.3 | -237.1 | -78.3 |
| December  | 8   | -140.3 | 53.9 | -214.8 | -86.9 | 1   | -102.6 | -    | -102.6 | -102.6 | 7   | -90.3  | 40.5 | -153.9 | -44.8 | 18  | -97.3  | 40.3 | -151.2 | -20.5 |
| DJF       | 37  | -134.5 | 53.9 | -258.8 | -47.0 | 17  | -108.3 | 41.4 | -186.5 | -39.8  | 30  | -85.5  | 40.6 | -166.4 | -30.8 | 95  | -87.8  | 52   | -247.9 | 11.8  |
| MAM       | 82  | -75.8  | 38.1 | -187.6 | 3.4   | 60  | -72.4  | 34.4 | -156.9 | 6.8    | 37  | -55.2  | 39.8 | -159.9 | 27.4  | 112 | -36.2  | 38.5 | -128.6 | 29.7  |
| JJA       | 141 | -28.6  | 26.3 | -112.3 | 38.2  | 85  | -21.6  | 24.2 | -85.3  | 19.6   | 28  | -9.4   | 29.6 | -63.2  | 45.2  | 43  | -10.5  | 26.8 | -89.22 | 36.5  |
| SON       | 78  | -75.2  | 44.5 | -187.8 | 26.6  | 21  | -45.1  | 42.1 | -144.7 | 30.0   | 20  | -56.1  | 46.9 | -151.9 | 24.9  | 22  | -95.9  | 70.2 | -237.1 | -0.5  |
| Annual    | 338 | -62.4  | 50.3 | -258.8 | 38.2  | 183 | -49.0  | 43.2 | -186.5 | 30.0   | 115 | -52.1  | 47.3 | -166.4 | 45.2  | 272 | -55    | 54.9 | -247.9 | 36.5  |
| Mixed     | 45  | -52.6  | 26.4 | -112.3 | 5.5   | 14  | -88.0  | 17.8 | -114.1 | -39.8  | 17  | -61.4  | 13.5 | -94.4  | -44.8 | 44  | -62.8  | 34.5 | -152.8 | -0.97 |
| Rain      | 173 | -31.4  | 26.6 | -104.1 | 38.2  | 137 | -30.6  | 28.4 | -115.1 | 30.0   | 66  | -22.8  | 29.9 | -83.0  | 45.2  | 152 | -24.3  | 34.4 | -119.9 | 36.5  |
| Snow      | 120 | -110.8 | 45.7 | -258.8 | -10.5 | 32  | -110.6 | 34.0 | -186.5 | -58.2  | 32  | -107.5 | 34.9 | -166.4 | -30.8 | 76  | -112   | 50.7 | -247.9 | -15.3 |

**D-excess, ‰**

|           |     |      |      |       |      |     |      |      |       |      |     |      |      |       |      |     |      |      |       |      |
|-----------|-----|------|------|-------|------|-----|------|------|-------|------|-----|------|------|-------|------|-----|------|------|-------|------|
| January   | 8   | 10.8 | 7.9  | -4.9  | 18.1 | 7   | 6.5  | 16.4 | -19.3 | 22.4 | 7   | 18.2 | 7.1  | 9.5   | 29.0 | 24  | 8.1  | 13.7 | -25.4 | 35.3 |
| February  | 21  | 6.4  | 10.9 | -22.2 | 17.1 | 9   | 5.6  | 13.3 | -26.1 | 15.7 | 16  | 18.0 | 4.8  | 9.0   | 25.9 | 53  | 12.6 | 10.3 | -18.2 | 34.1 |
| March     | 25  | 14.0 | 6.7  | -3.7  | 23.1 | 9   | 6.2  | 5.4  | -3.2  | 12.4 | 16  | 15.8 | 7.1  | -1.6  | 25.3 | 44  | 14.9 | 8.7  | -6.7  | 33.2 |
| April     | 20  | 12.5 | 7.8  | -11.0 | 26.5 | 18  | 7.9  | 9.2  | -19.1 | 23.3 | 9   | 14.9 | 3.7  | 7.5   | 20.0 | 35  | 11.8 | 6.0  | -1.8  | 24.5 |
| May       | 37  | 15.8 | 6.7  | -8.3  | 24.4 | 33  | 14.5 | 4.8  | 4.5   | 27.1 | 12  | 13.5 | 5.5  | 6.8   | 23.7 | 33  | 6.5  | 9.3  | -12.2 | 21.2 |
| June      | 47  | 10.5 | 9.9  | -14.5 | 23.0 | 30  | 10.7 | 9.9  | -31.0 | 21.1 | 5   | 5.1  | 7.6  | -2.2  | 17.4 | 17  | -1.7 | 9.2  | -15.7 | 14.9 |
| July      | 45  | 8.8  | 11.5 | -26.5 | 23.1 | 31  | 14.9 | 9.7  | -26.3 | 27.1 | 8   | -0.1 | 8.7  | -14.9 | 11.8 | 15  | -3.5 | 9.1  | -25.2 | 10.0 |
| August    | 49  | 13.1 | 7.5  | -5.1  | 24.1 | 24  | 19.8 | 6.5  | -0.2  | 29.1 | 15  | 6.2  | 17.6 | -23.8 | 46.4 | 11  | 13.4 | 8.4  | -4.1  | 23.8 |
| September | 34  | 15.8 | 8.1  | -4.0  | 29.1 | 14  | 22.4 | 5.4  | 7.5   | 28.3 | 6   | 14.3 | 14.4 | -0.9  | 40.4 | 4   | 6.8  | 10.3 | -5.5  | 18.4 |
| October   | 30  | 14.1 | 8.0  | -5.0  | 29.3 | 5   | 11.6 | 11.5 | -5.9  | 22.4 | 7   | 23.5 | 11.2 | 13.1  | 41.1 | 4   | 20.6 | 1.5  | 19.8  | 22.8 |
| November  | 14  | 16.5 | 9.9  | 3.1   | 31.1 | 2   | 13.8 | 6.2  | 9.4   | 18.2 | 7   | 24.8 | 17.4 | 6.2   | 54.2 | 14  | 15.5 | 5.4  | 8.7   | 26.3 |
| December  | 8   | 14.2 | 6.1  | 6.2   | 25.9 | 1   | 20.9 | *    | 20.9  | 20.9 | 7   | 29.5 | 13.6 | 11.1  | 45.7 | 18  | 15.8 | 5.5  | 6.4   | 30.1 |
| DJF       | 37  | 9.0  | 9.8  | -22.2 | 25.9 | 17  | 6.9  | 14.3 | -26.1 | 22.4 | 30  | 20.7 | 9.2  | 9.0   | 45.7 | 95  | 12.1 | 10.8 | -25.4 | 35.3 |
| MAM       | 82  | 14.5 | 7.0  | -11.0 | 26.5 | 60  | 11.3 | 7.4  | -19.1 | 27.1 | 37  | 14.8 | 5.9  | -1.6  | 25.3 | 112 | 11.4 | 8.8  | -12.2 | 33.2 |
| JJA       | 141 | 10.9 | 9.8  | -26.5 | 24.1 | 85  | 14.8 | 9.6  | -31.0 | 29.1 | 28  | 4.2  | 14.0 | -23.8 | 46.4 | 43  | 1.5  | 11.2 | -25.2 | 23.8 |
| SON       | 78  | 15.2 | 8.3  | -5.0  | 31.1 | 21  | 19.0 | 8.5  | -5.9  | 28.3 | 20  | 21.2 | 14.5 | -0.9  | 54.2 | 22  | 14.9 | 7.2  | -5.5  | 26.3 |
| Annual    | 338 | 12.5 | 9.1  | -26.5 | 31.1 | 183 | 13.4 | 9.8  | -31.0 | 29.1 | 115 | 14.9 | 12.6 | -23.8 | 54.2 | 272 | 10.4 | 10.6 | -25.4 | 35.3 |
| Mixed     | 45  | 15.2 | 7.2  | -8.3  | 25.4 | 14  | 3.7  | 10.7 | -26.1 | 18.4 | 17  | 22.8 | 10.7 | 13.1  | 54.2 | 44  | 17.6 | 7.8  | 1.8   | 35.3 |
| Rain      | 173 | 11.9 | 9.9  | -26.5 | 29.3 | 137 | 15.3 | 9.1  | -31.0 | 29.1 | 66  | 11.2 | 13.5 | -23.8 | 46.4 | 152 | 7.8  | 10.1 | -25.2 | 29.6 |
| Snow      | 120 | 12.5 | 8.5  | -22.2 | 31.1 | 32  | 9.7  | 8.9  | -19.3 | 22.4 | 32  | 18.4 | 8.0  | 7.1   | 45.7 | 76  | 11.3 | 10.9 | -25.4 | 31.3 |

Table S2: Stepwise regression equations for the meteorological seasons linking  $\delta^{18}\text{O}$ ,  $\delta\text{D}$ , and D-excess with latitude, longitude, and elevation.

| Season | $\delta^{18}\text{O}$                                                                        | $\delta\text{D}$                                                                       | D-excess                                                                                 |
|--------|----------------------------------------------------------------------------------------------|----------------------------------------------------------------------------------------|------------------------------------------------------------------------------------------|
| DJF    | $\delta^{18}\text{O}_{\text{DJF}} = -15.8 - 0.04\text{Lat} + 0.15\text{Lon} - 0.005\text{E}$ | $\delta\text{D}_{\text{DJF}} = -223 + 1.94\text{Lat} + 1.57\text{Lon} - 0.04\text{E}$  | $\text{D-excess}_{\text{DJF}} = -96.5 + 2.26\text{Lat} + 0.34\text{Lon} - 0.007\text{E}$ |
| MAM    | $\delta^{18}\text{O}_{\text{MAM}} = 51.8 - 0.84\text{Lat} - 0.29\text{Lon} - 0.002\text{E}$  | $\delta\text{D}_{\text{MAM}} = 427 - 5.84\text{Lat} - 2.94\text{Lon} - 0.009\text{E}$  | $\text{D-excess}_{\text{MAM}} = 12.8 + 0.89\text{Lat} - 0.61\text{Lon} - 0.002\text{E}$  |
| JJA    | $\delta^{18}\text{O}_{\text{JJA}} = 30.3 - 0.66\text{Lat} - 0.01\text{Lon} - 0.002\text{E}$  | $\delta\text{D}_{\text{JJA}} = 302 - 7.89\text{Lat} + 0.49\text{Lon} - 0.01\text{E}$   | $\text{D-excess}_{\text{JJA}} = 58.9 - 2.59\text{Lat} + 0.59\text{Lon} + 0.001\text{E}$  |
| SON    | $\delta^{18}\text{O}_{\text{SON}} = -29.9 - 2.02\text{Lat} + 1.51\text{Lon} - 0.004\text{E}$ | $\delta\text{D}_{\text{SON}} = -306 - 16.97\text{Lat} + 13.9\text{Lon} - 0.04\text{E}$ | $\text{D-excess}_{\text{SON}} = -66.4 - 0.83\text{Lat} + 1.80\text{Lon} - 0.01\text{E}$  |

Table S3: Mean isotopic ratios for the warm (May-October) and cold (November-April) periods for all samples;  $\delta_w$  – warm period (May-October);  $\delta_c$  – cold period (November-April).

| Period                | Oxygen, ‰ |       |       |       | Hydrogen, ‰ |       |       |       |
|-----------------------|-----------|-------|-------|-------|-------------|-------|-------|-------|
|                       | UA        | CKS   | AA    | CHK   | UA          | CKS   | AA    | CHK   |
| May-October           | -6.9      | -6.0  | -4.1  | -2.3  | -42.8       | -33.0 | -22.5 | -14.1 |
| November-April        | -15.5     | -13.0 | -12.1 | -10.8 | -111.6      | -96.7 | -77.4 | -73.2 |
| $\delta_w - \delta_c$ | 8.6       | 7.0   | 8.0   | 8.5   | 68.8        | 63.7  | 54.9  | 59.1  |

Table S4: Correlation between  $\delta^{18}\text{O}$  and  $\delta\text{D}$  and air temperature for each sampling site. Coefficients of determination are statistically significant at 95% confidence level at all sites except Tashkent.

| Sampling site                  | $\delta^{18}\text{O}$                                 |       | $\delta\text{D}$                                 |       |
|--------------------------------|-------------------------------------------------------|-------|--------------------------------------------------|-------|
|                                | Equation                                              | $R^2$ | Equation                                         | $R^2$ |
| Bolshoe Almatinskoe Lake (BAL) | $\delta^{18}\text{O}_{\text{Annual}} = 0.69t - 10.45$ | 0.59  | $\delta\text{D}_{\text{Annual}} = 5.33t - 70.76$ | 0.60  |
| Lesnoy Cordon                  | $\delta^{18}\text{O}_{\text{Annual}} = 0.67t - 11.72$ | 0.46  | $\delta\text{D}_{\text{Annual}} = 5.50t - 81.25$ | 0.49  |
| Baityk                         | $\delta^{18}\text{O}_{\text{Annual}} = 0.60t - 11.35$ | 0.66  | $\delta\text{D}_{\text{Annual}} = 4.10t - 72.33$ | 0.59  |
| Tashkent                       | $\delta^{18}\text{O}_{\text{Annual}} = 0.32t - 9.06$  | 0.27  | $\delta\text{D}_{\text{Annual}} = 2.46t - 61.53$ | 0.27  |
| Pskem                          | $\delta^{18}\text{O}_{\text{Annual}} = 0.55t - 9.85$  | 0.54  | $\delta\text{D}_{\text{Annual}} = 3.79t - 63.08$ | 0.47  |
| Oygaing                        | $\delta^{18}\text{O}_{\text{Annual}} = 0.74t - 10.09$ | 0.64  | $\delta\text{D}_{\text{Annual}} = 5.50t - 81.25$ | 0.56  |

Table S5: Summary of the OLSR calculations. SE is standard error.

| <b>Territory</b>  | <b>Slope</b> | <b>SE</b> | <b>Intersept</b> | <b>SE</b> | <b>R<sup>2</sup></b> | <b>n</b> |
|-------------------|--------------|-----------|------------------|-----------|----------------------|----------|
| CA (all samples)  | 7.57         | 0.05      | 8.71             | 0.55      | 0.96                 | 909      |
| CA (DJF)          | 8.10         | 0.13      | 13.78            | 2.06      | 0.95                 | 179      |
| CA (MAM)          | 7.75         | 0.09      | 10.52            | 0.88      | 0.97                 | 291      |
| CA (JJA)          | 6.17         | 0.12      | 2.66             | 0.70      | 0.90                 | 297      |
| CA (SON)          | 7.72         | 0.12      | 13.50            | 1.53      | 0.97                 | 142      |
| CA (rain)         | 6.64         | 0.09      | 4.74             | 0.58      | 0.91                 | 529      |
| CA (mixed)        | 7.73         | 0.25      | 13.21            | 2.57      | 0.89                 | 120      |
| CA (snow)         | 7.95         | 0.11      | 11.77            | 1.74      | 0.96                 | 260      |
| UA (all samples)  | 7.56         | 0.07      | 8.41             | 0.82      | 0.97                 | 338      |
| UA (DJF)          | 7.69         | 0.23      | 3.52             | 4.49      | 0.97                 | 37       |
| UA (MAM)          | 8.04         | 0.17      | 14.89            | 2.04      | 0.97                 | 82       |
| UA (JJA)          | 6.27         | 0.14      | 2.36             | 0.91      | 0.93                 | 141      |
| UA (SON)          | 7.50         | 0.15      | 9.55             | 1.95      | 0.97                 | 78       |
| UA (rain)         | 6.29         | 0.13      | 2.63             | 0.88      | 0.93                 | 173      |
| UA (mixed)        | 7.16         | 0.28      | 8.09             | 2.55      | 0.94                 | 45       |
| UA (snow)         | 7.83         | 0.13      | 9.88             | 2.22      | 0.97                 | 120      |
| CKS (all samples) | 7.87         | 0.14      | 12.42            | 1.29      | 0.95                 | 183      |
| CKS (DJF)         | 6.68         | 0.52      | -12.14           | 8.04      | 0.91                 | 17       |
| CKS (MAM)         | 8.41         | 0.24      | 15.57            | 2.63      | 0.96                 | 60       |
| CKS (JJA)         | 6.54         | 0.26      | 8.16             | 1.46      | 0.89                 | 85       |
| CKS (SON)         | 7.60         | 0.35      | 15.79            | 3.33      | 0.96                 | 21       |
| CKS (rain)        | 7.09         | 0.19      | 10.02            | 1.30      | 0.91                 | 137      |
| CKS (mixed)       | 5.21         | 0.50      | -28.33           | 5.90      | 0.89                 | 14       |
| CKS (snow)        | 7.46         | 0.35      | 1.58             | 5.54      | 0.93                 | 32       |
| AA (all samples)  | 7.01         | 0.15      | 6.62             | 1.64      | 0.95                 | 115      |
| AA (DJF)          | 8.05         | 0.35      | 21.36            | 5.01      | 0.95                 | 30       |
| AA (MAM)          | 7.69         | 0.19      | 12.13            | 1.89      | 0.98                 | 37       |
| AA (JJA)          | 6.09         | 0.48      | 0.96             | 2.29      | 0.85                 | 28       |
| AA (SON)          | 7.25         | 0.53      | 14.00            | 5.99      | 0.91                 | 20       |
| AA (rain)         | 6.08         | 0.28      | 3.00             | 1.72      | 0.88                 | 66       |
| AA (mixed)        | 5.74         | 1.65      | -1.05            | 17.56     | 0.41                 | 17       |
| AA (snow)         | 8.08         | 0.35      | 19.65            | 5.63      | 0.95                 | 32       |
| CHK (all samples) | 7.66         | 0.09      | 7.65             | 0.99      | 0.96                 | 272      |
| CHK (DJF)         | 8.38         | 0.18      | 16.74            | 2.51      | 0.96                 | 95       |
| CHK (MAM)         | 7.45         | 0.16      | 8.17             | 1.23      | 0.95                 | 112      |
| CHK (JJA)         | 6.15         | 0.35      | -2.00            | 1.60      | 0.90                 | 43       |
| CHK (SON)         | 8.05         | 0.19      | 15.53            | 3.01      | 0.99                 | 22       |
| CHK (rain)        | 7.09         | 0.16      | 4.11             | 1.02      | 0.93                 | 145      |
| CHK (mixed)       | 8.60         | 0.29      | 23.68            | 3.15      | 0.95                 | 52       |
| CHK (snow)        | 8.22         | 0.20      | 14.67            | 3.35      | 0.96                 | 75       |

Table S6: The values of slopes, intercepts, and standard deviations from different regression methods applied to the monthly-averaged and event-based data sets. Results of t-test comparing each regression method and OLSR are shown. N is a number of samples. The metrics are as follows: slope of regression line (a), standard deviation of the slope (sa), intercept of regression line (b), standard deviation of the intercept (sb), average value of the sum of the squared errors of three methods OLSR, RMA and MA (or three precipitation weighted) regressions, root mean Sum of Squared Errors (RMSSE), which allow inter-comparison of the different regression methods. The proximity of the RMSSE values to 1.0 is an indicator of the suitability of a used regression method for the analysed data set.

| Monthly     | N   | a      | sa     | b       | sb     | RMSSE  | t-value | p-value |
|-------------|-----|--------|--------|---------|--------|--------|---------|---------|
| OLSR        | 137 | 7.5778 | 0.1182 | 9.7101  | 1.2355 | 1.0074 |         |         |
| RMA         | 137 | 7.7012 | 0.1173 | 10.7859 | 1.2279 | 1.0026 | 0.7378  | 0.46    |
| MA          | 137 | 7.8224 | 0.1206 | 11.8433 | 1.2607 | 1.0057 | 1.4549  | 0.15    |
| PWLSR       | 137 | 7.7358 | 0.1165 | 12.1886 | 1.0953 | 1.0012 | 0.9331  | 0.35    |
| PWRMA       | 137 | 7.8533 | 0.1171 | 13.1535 | 1.1005 | 1.0049 | 1.6181  | 0.11    |
| PWMA        | 137 | 7.9689 | 0.1182 | 14.1021 | 1.111  | 1.0152 | 2.2763  | 0.03    |
| Event-based | N   | a      | sa     | b       | sb     | RMSSE  | t-value | p-value |
| OLSR        | 869 | 7.5606 | 0.0509 | 8.8169  | 0.5436 | 1.0079 |         |         |
| RMA         | 869 | 7.7075 | 0.0508 | 10.0619 | 0.544  | 1.0031 | 2.0376  | 0.04    |
| MA          | 869 | 7.8524 | 0.0518 | 11.2895 | 0.5538 | 1.0078 | 4.0184  | <0.01   |
| PWLSR       | 869 | 7.8576 | 0.0508 | 14.2822 | 0.5326 | 1      | 3.9999  | <0.01   |
| PWRMA       | 869 | 7.9987 | 0.051  | 15.5161 | 0.5349 | 1.0123 | 5.8342  | <0.01   |
| PWMA        | 869 | 8.1379 | 0.0517 | 16.7339 | 0.5419 | 1.0313 | 7.5758  | <0.01   |

Table S7: The values of slopes and intercepts and standard errors for different regressions methods applied to event-based samples for each catchment. All metrics are as in Table S6.

| Ulken Almaty   | N   | a      | sa     | b       | sb     | RMSSE  | t-value | p-value |
|----------------|-----|--------|--------|---------|--------|--------|---------|---------|
| OLSR           | 332 | 7.5437 | 0.0721 | 8.3315  | 0.8212 | 1.0061 |         |         |
| RMA            | 332 | 7.6564 | 0.0718 | 9.3836  | 0.8197 | 1.0024 | 1.1042  | 0.27    |
| MA             | 332 | 7.767  | 0.0731 | 10.4159 | 0.833  | 1.006  | 2.1758  | 0.03    |
| PWLSR          | 332 | 7.8049 | 0.0748 | 12.6969 | 0.8637 | 1      | 2.5067  | 0.01    |
| PWRMA          | 332 | 7.9221 | 0.075  | 13.8732 | 0.8669 | 1.0144 | 3.591   | <0.01   |
| PWMA           | 332 | 8.0374 | 0.0758 | 15.0299 | 0.8762 | 1.0348 | 4.6175  | <0.01   |
| Chon Kyzyl Suu | N   | a      | sa     | b       | sb     | RMSSE  | t-value | p-value |
| OLSR           | 149 | 7.9449 | 0.1457 | 14.2324 | 1.2822 | 1.0099 |         |         |
| RMA            | 149 | 8.139  | 0.1447 | 15.6373 | 1.276  | 1.0039 | 0.939   | 0.35    |
| MA             | 149 | 8.332  | 0.1492 | 17.0342 | 1.3126 | 1.0098 | 1.8561  | 0.07    |
| PWLSR          | 149 | 8.4272 | 0.1154 | 20.8734 | 1.0011 | 1      | 2.2304  | 0.03    |
| PWRMA          | 149 | 8.5426 | 0.1158 | 21.7223 | 1.0045 | 1.0101 | 2.7389  | 0.01    |
| PWMA           | 149 | 8.6565 | 0.117  | 22.5598 | 1.0145 | 1.0231 | 3.2258  | <0.01   |
| Ala Archa      | N   | a      | sa     | b       | sb     | RMSSE  | t-value | p-value |
| OLSR           | 115 | 7.0141 | 0.1545 | 6.6244  | 1.641  | 1.0109 |         |         |
| RMA            | 115 | 7.2037 | 0.1531 | 8.2119  | 1.6308 | 1.0043 | 0.8652  | 0.39    |
| MA             | 115 | 7.3912 | 0.1585 | 9.7814  | 1.6837 | 1.0108 | 1.704   | 0.09    |

|          |     |        |        |         |        |        |         |       |
|----------|-----|--------|--------|---------|--------|--------|---------|-------|
| PWLSR    | 115 | 7.117  | 0.1559 | 9.4696  | 1.8109 | 1.0028 | 0.4668  | 0.47  |
| PWRMA    | 115 | 7.3073 | 0.1569 | 11.3159 | 1.8228 | 1.0074 | 1.3178  | 0.19  |
| PWMA     | 115 | 7.4956 | 0.1599 | 13.1428 | 1.8576 | 1.0243 | 2.1311  | 0.04  |
| Chirchik | N   | a      | sa     | b       | sb     | RMSSE  | t-value |       |
| OLSR     | 272 | 7.6396 | 0.0885 | 7.4144  | 0.954  | 1.0073 |         |       |
| RMA      | 272 | 7.7767 | 0.0881 | 8.5341  | 0.9523 | 1.0029 | 1.0933  | 0.28  |
| MA       | 272 | 7.9117 | 0.09   | 9.6371  | 0.9706 | 1.0072 | 2.1562  | 0.03  |
| PWLSR    | 272 | 7.7797 | 0.0869 | 11.3965 | 0.9194 | 1.0013 | 1.0966  | 0.27  |
| PWRMA    | 272 | 7.9097 | 0.0873 | 12.4983 | 0.9232 | 1.0056 | 2.0997  | 0.04  |
| PWMA     | 272 | 8.0376 | 0.0883 | 13.5835 | 0.9342 | 1.0166 | 3.064   | <0.01 |

Table S8: The values of slopes and intercepts and standard errors for different regressions methods applied to the event-based precipitation in different seasons. All metrics are as in Table S6.

| Event-based DJF | N   | a      | sa     | b       | sb     | rmSSEav | t-value | p-value |
|-----------------|-----|--------|--------|---------|--------|---------|---------|---------|
| OLSR            | 168 | 8.1417 | 0.1354 | 14.6149 | 2.073  | 1.0092  |         |         |
| RMA             | 168 | 8.3266 | 0.1346 | 17.1842 | 2.0626 | 1.0036  | 0.9626  | 0.34    |
| MA              | 168 | 8.5104 | 0.1384 | 19.738  | 2.1187 | 1.0091  | 1.9036  | 0.06    |
| PWLSR           | 168 | 8.0465 | 0.1349 | 15.2372 | 1.992  | 1.018   | 0.4931  | 0.62    |
| PWRMA           | 168 | 8.2321 | 0.1357 | 17.7164 | 2.0034 | 1.0048  | 0.4685  | 0.64    |
| PWMA            | 168 | 8.4165 | 0.1379 | 20.1798 | 2.0367 | 1.0031  | 1.4176  | 0.16    |
| Event-based MAM | N   | a      | sa     | b       | sb     | rmSSEav | t-value |         |
| OLSR            | 273 | 7.7301 | 0.0867 | 10.7352 | 0.8727 | 1.0069  |         |         |
| RMA             | 273 | 7.8607 | 0.0863 | 11.855  | 0.8705 | 1.0027  | 1.0629  | 0.29    |
| MA              | 273 | 7.9892 | 0.0881 | 12.9578 | 0.887  | 1.0068  | 2.0968  | 0.04    |
| PWLSR           | 273 | 8.0178 | 0.0826 | 14.5088 | 0.8818 | 1       | 2.3071  | 0.02    |
| PWRMA           | 273 | 8.1324 | 0.0829 | 15.5757 | 0.8849 | 1.0127  | 3.1927  | <0.01   |
| PWMA            | 273 | 8.2451 | 0.0838 | 16.6258 | 0.894  | 1.0304  | 4.0353  | <0.01   |
| Event-based JJA | N   | a      | sa     | b       | sb     | rmSSEav | t-value |         |
| OLSR            | 290 | 6.2077 | 0.1185 | 2.8686  | 0.6886 | 1.0205  |         |         |
| RMA             | 290 | 6.5255 | 0.1181 | 4.1605  | 0.6906 | 1.0079  | 1.8841  | 0.06    |
| MA              | 290 | 6.8446 | 0.1243 | 5.4575  | 0.7223 | 1.0202  | 3.7075  | <0.01   |
| PWLSR           | 290 | 6.8188 | 0.135  | 9.7689  | 0.843  | 1       | 3.3468  | <0.01   |
| PWRMA           | 290 | 7.1934 | 0.1368 | 11.7214 | 0.8542 | 1.0444  | 5.1796  | <0.01   |
| PWMA            | 290 | 7.5739 | 0.1422 | 13.705  | 0.8876 | 1.1069  | 6.8131  | <0.01   |
| Event-based SON | N   | a      | sa     | b       | sb     | rmSSEav | t-value |         |
| OLSR            | 138 | 7.7143 | 0.1222 | 13.2973 | 1.5572 | 1.0069  |         |         |



|       |     |        |        |         |        |        |        |       |
|-------|-----|--------|--------|---------|--------|--------|--------|-------|
| RMA   | 138 | 7.8448 | 0.1213 | 14.7225 | 1.5476 | 1.0027 | 0.7534 | 0.45  |
| MA    | 138 | 7.9732 | 0.1242 | 16.1258 | 1.5826 | 1.0068 | 1.4862 | 0.14  |
| PWLSR | 138 | 8.0415 | 0.1261 | 19.119  | 1.7186 | 1      | 1.8438 | 0.07  |
| PWRMA | 138 | 8.1749 | 0.1266 | 20.7757 | 1.7256 | 1.0194 | 2.5579 | 0.01  |
| PWMA  | 138 | 8.3065 | 0.1281 | 22.4107 | 1.7463 | 1.0453 | 3.2302 | <0.01 |

Table S9: The values of slopes, intercepts and standard errors for different regressions methods applied each type of precipitation. All metrics are as in Table S6.

| Rain  | N   | a      | sa     | b       | sb     | rmSSEav | t-value | p-value |
|-------|-----|--------|--------|---------|--------|---------|---------|---------|
| OLSR  | 514 | 6.6615 | 0.0889 | 4.9455  | 0.5849 | 1.0179  |         |         |
| RMA   | 514 | 6.9574 | 0.0887 | 6.4088  | 0.5865 | 1.0069  | 2.341   | 0.02    |
| MA    | 514 | 7.2541 | 0.0927 | 7.8765  | 0.6099 | 1.0176  | 4.6148  | <0.01   |
| PWLSR | 514 | 7.3314 | 0.0935 | 11.6977 | 0.6652 | 1       | 5.0051  | <0.01   |
| PWRMA | 514 | 7.6294 | 0.0944 | 13.4627 | 0.6718 | 1.0365  | 7.006   | <0.01   |
| PWMA  | 514 | 7.9292 | 0.0972 | 15.2385 | 0.6914 | 1.0856  | 8.8251  | <0.01   |
| Mixed | N   | a      | sa     | b       | sb     | rmSSEav | t-value |         |
| OLSR  | 113 | 7.6191 | 0.2487 | 12.7937 | 2.5384 | 1.0233  |         |         |
| RMA   | 113 | 8.057  | 0.2465 | 16.9766 | 2.5202 | 1.009   | 1.2366  | 0.22    |
| MA    | 113 | 8.5065 | 0.2626 | 21.2692 | 2.6801 | 1.0231  | 2.4537  | 0.02    |
| PWLSR | 113 | 7.9792 | 0.2094 | 16.1732 | 2.1009 | 1.006   | 1.0192  | 0.31    |
| PWRMA | 113 | 8.2785 | 0.2113 | 18.9864 | 2.1201 | 1.0091  | 1.8458  | 0.07    |
| PWMA  | 113 | 8.5802 | 0.217  | 21.8225 | 2.1775 | 1.0243  | 2.645   | <0.01   |
| Snow  | N   | a      | sa     | b       | sb     | rmSSEav | t-value |         |
| OLSR  | 241 | 7.995  | 0.1086 | 12.7211 | 1.7801 | 1.0089  |         |         |
| RMA   | 241 | 8.1708 | 0.1081 | 15.4332 | 1.7738 | 1.0035  | 1.1415  | 0.25    |
| MA    | 241 | 8.3452 | 0.1109 | 18.1239 | 1.8181 | 1.0088  | 2.256   | 0.02    |
| PWLSR | 241 | 7.9762 | 0.1174 | 14.1555 | 1.9575 | 1.0085  | 0.1214  | 0.90    |
| PWRMA | 241 | 8.1817 | 0.1181 | 17.4222 | 1.9699 | 1.0036  | 1.2004  | 0.23    |
| PWMA  | 241 | 8.3862 | 0.1203 | 20.6755 | 2.0065 | 1.0128  | 2.4886  | 0.01    |

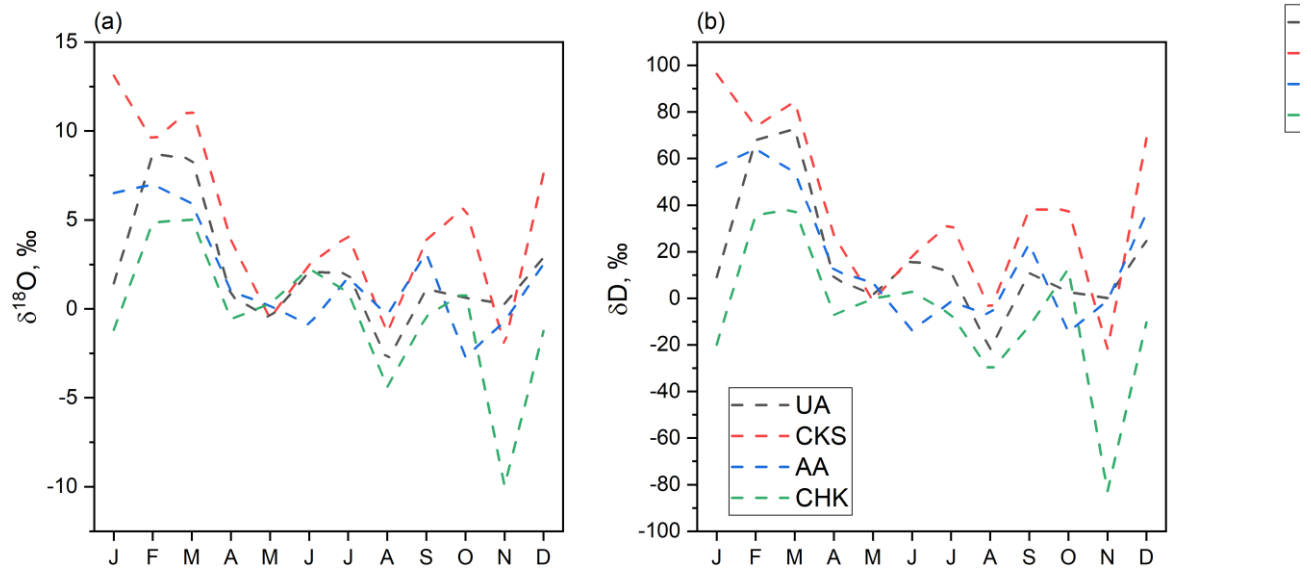

Figure S1: The difference between the data from the Waterisotopes Database and data obtained in this study for (a)  $\delta^{18}\text{O}$ ; (b)  $\delta\text{D}$

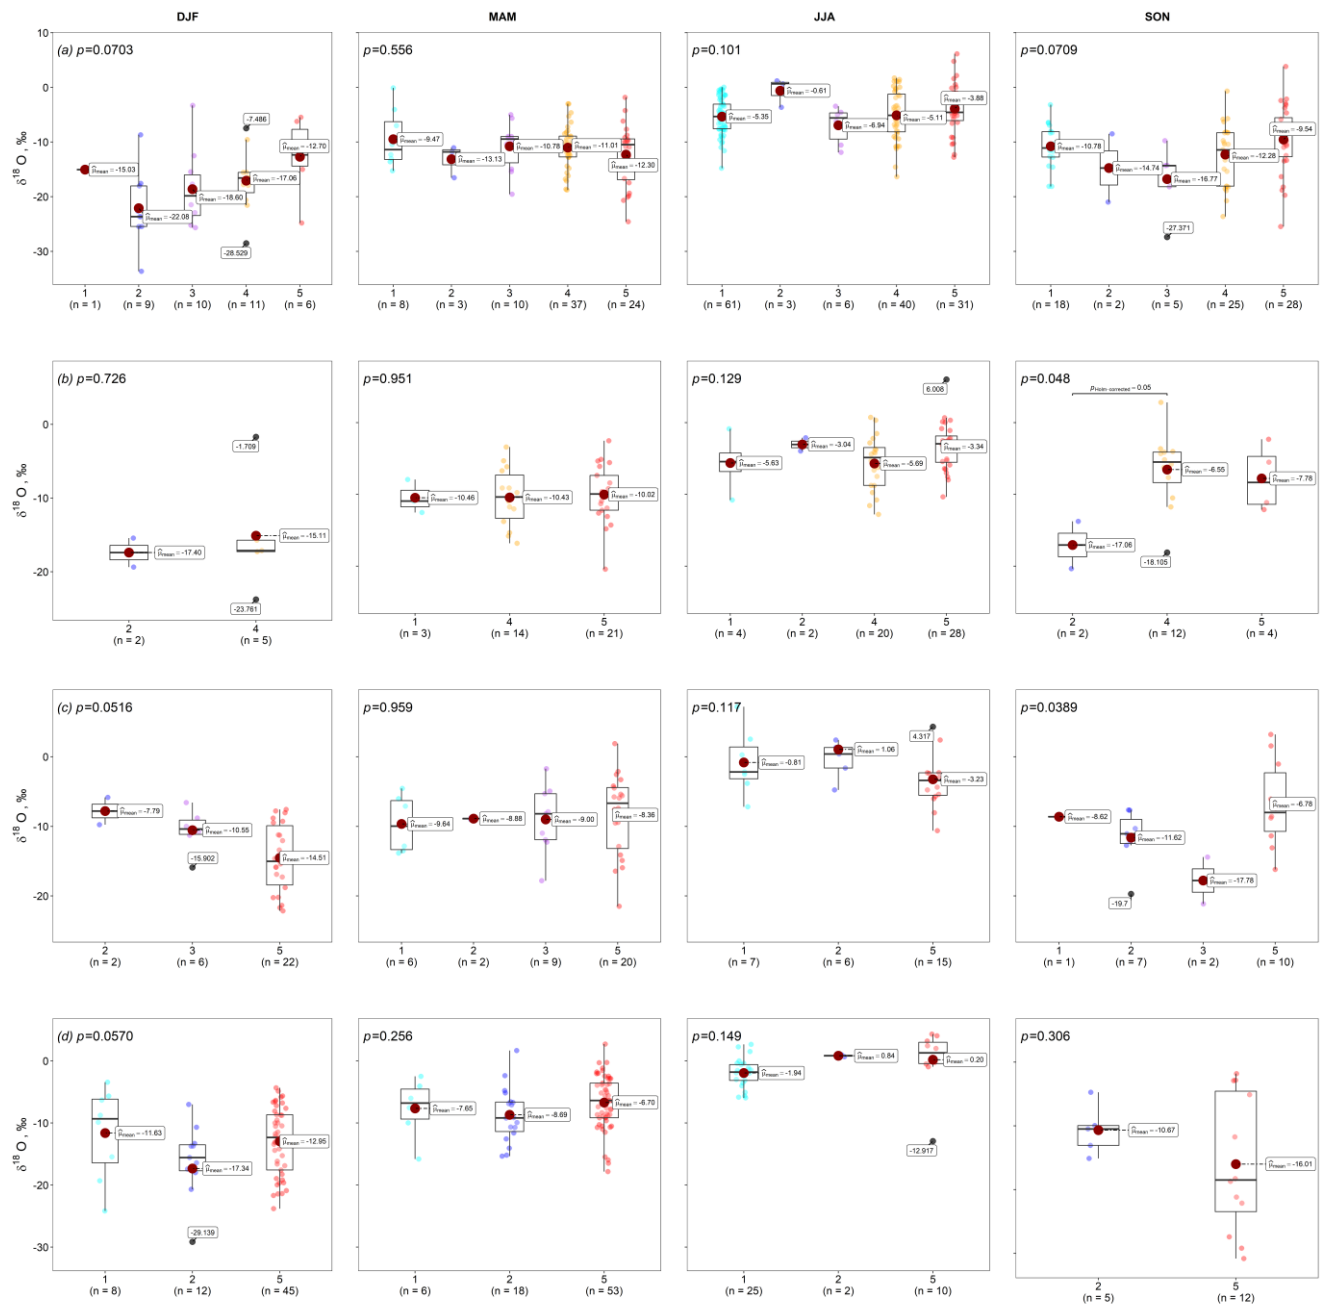

Figure S2: Values of  $\delta^{18}\text{O}$  for each original cluster for each site and season: (a) UA; (b) CKS; (c) AA; (d) CHK.

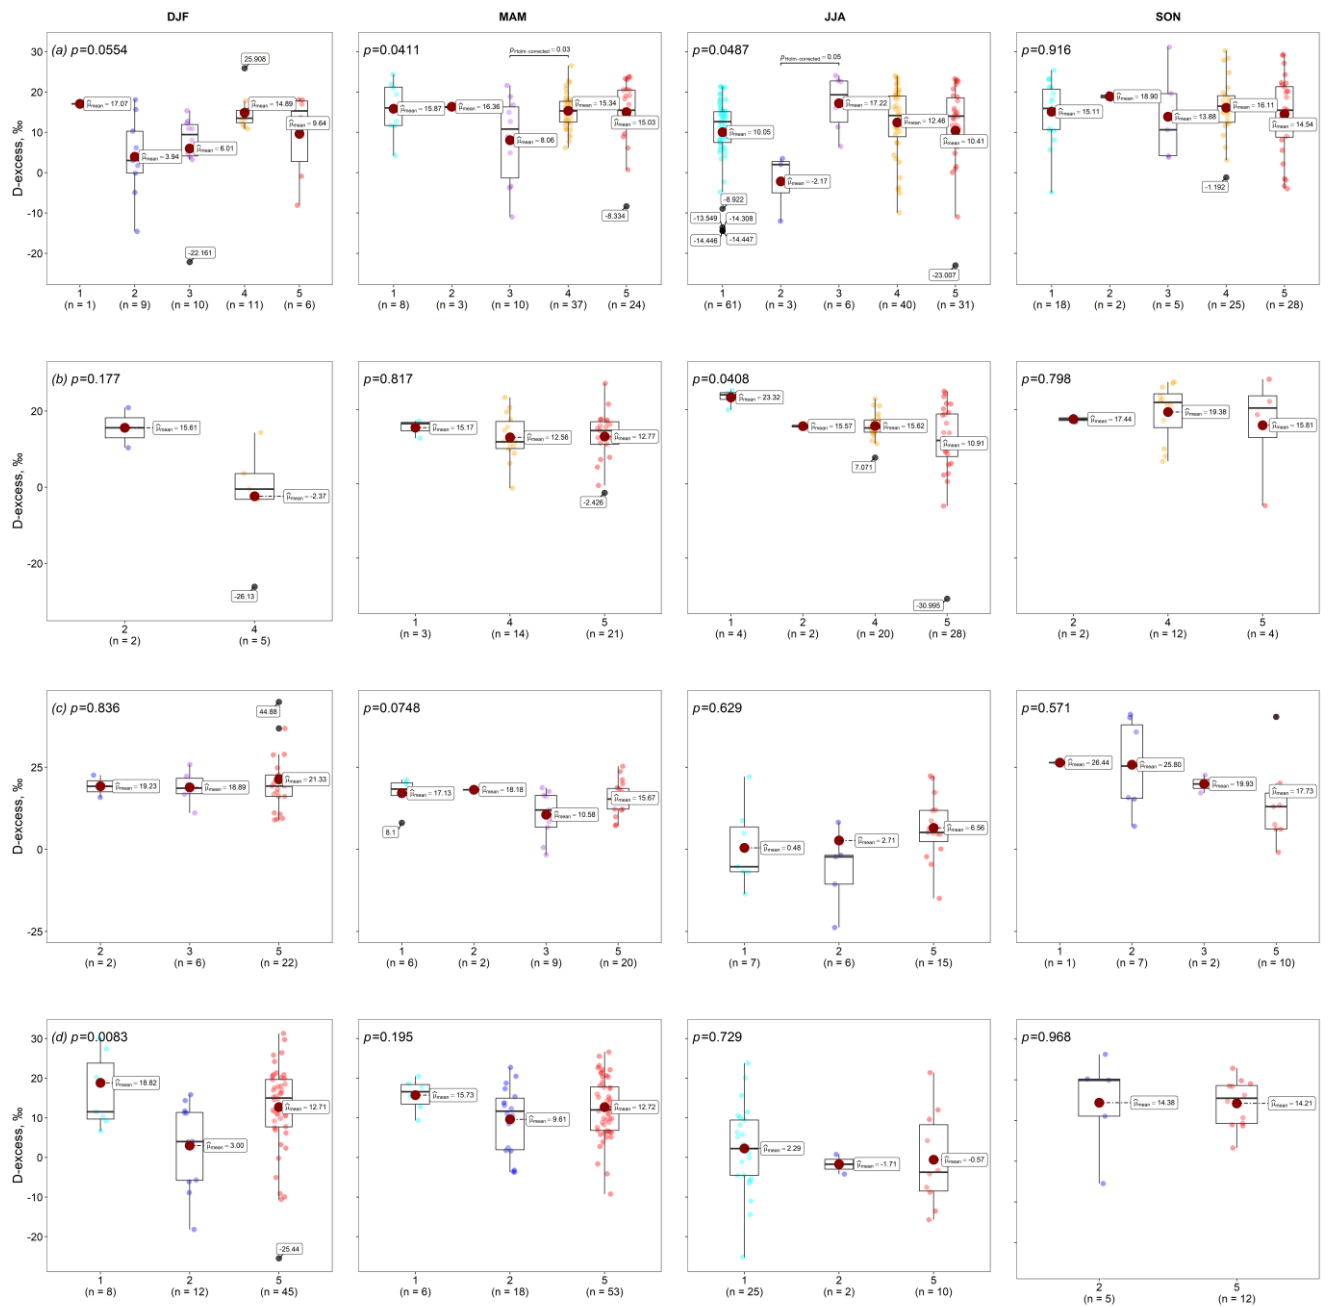

Figure S3: Values of D-excess for each original cluster for each site and season: (a) UA; (b) CKS; (c) AA; (d) CHK.
